# Supplementary material for: An efficient synthesis of 1,5-benzadiazepine derivatives catalyzed by silver nitrate
Source: Royal Society of Chemistry journal article supplement (doi:10.1039/b601993e), 2006-01-01
Supplement: additions and correctionsb615950h.doc [file additions%20and%20correctionsb615950h.doc]

| **Additions and corrections** An efficient synthesis of 1,5-benzadiazepine derivatives catalyzed by silver nitrate |
| --- |

**Rupesh Kumar, Preeti Chaudhary, Surendra Nimesh, Akhilesh K. Verma and Ramesh Chandra**

*Green Chem.*, 2006, **8**, 519-521, (DOI: 10.1039/b601993e)

Our attention has been drawn to the elegant work of Kaupp, Pogodda and Schmeyers entitled ‘Gas/Solid Reactions with Acetone’ (*Chem. Ber.,* 1994, **127**, 2249–2261) who use a somewhat different strategy for making the salt of benzodiazepine *via* a gas phase reactor with acetone. Our paper complements this work and provides an alternative route to the product, which may well be optimised in the future to give similar yields.

The Royal Society of Chemistry apologises for these errors and any consequent inconvenience to authors and readers.

**Additions and corrections can be viewed online by accessing the original article to which they apply.**
